# Supplementary material for: Enablers and barriers to the implementation of primary health care interventions for Indigenous people with chronic diseases: a systematic review
Source: PubMed Central journal article supplement (PMC4465476; doi:10.1186/s13012-015-0261-x), 2015-05-22
Supplement: 13012_2015_261_MOESM2_ESM.pdf [file 13012_2015_261_MOESM2_ESM.pdf]

**Additional file 2: QARI data extraction instrument**

**JBI QARI Data Extraction Form for Interpretive & Critical Research**

Reviewer ..... Date .....

Author ..... Year .....

Journal ..... Record Number .....

**Study Description**

Methodology  
\_\_\_\_\_  
\_\_\_\_\_

Method  
\_\_\_\_\_  
\_\_\_\_\_

Phenomena of interest  
\_\_\_\_\_  
\_\_\_\_\_

Setting  
\_\_\_\_\_  
\_\_\_\_\_

Geographical  
\_\_\_\_\_  
\_\_\_\_\_

Cultural  
\_\_\_\_\_  
\_\_\_\_\_

Participants  
\_\_\_\_\_  
\_\_\_\_\_

Data analysis  
\_\_\_\_\_  
\_\_\_\_\_

Authors Conclusions  
\_\_\_\_\_  
\_\_\_\_\_

Comments  
\_\_\_\_\_  
\_\_\_\_\_

Complete

Yes

No
