# Supplementary material for: Enablers and barriers to the implementation of primary health care interventions for Indigenous people with chronic diseases: a systematic review
Source: PubMed Central journal article supplement (PMC4465476; doi:10.1186/s13012-015-0261-x), 2015-05-22
Supplement: 13012_2015_261_MOESM3_ESM.pdf [file 13012_2015_261_MOESM3_ESM.pdf]

### Additional file 3: Characteristics of included studies

| Characteristics of included qualitative studies |                                                                                                                        |                                                                                                                                                              |                                             |                                                                                                                                          |                                                |
|-------------------------------------------------|------------------------------------------------------------------------------------------------------------------------|--------------------------------------------------------------------------------------------------------------------------------------------------------------|---------------------------------------------|------------------------------------------------------------------------------------------------------------------------------------------|------------------------------------------------|
| First author, date published (state, country)   | Intervention and Health Condition                                                                                      | Phenomena of Interest                                                                                                                                        | Methods                                     | Participants                                                                                                                             | Setting                                        |
| Bailie 2004<br>(NT, Australia) <sup>20</sup>    | Implementing best practice clinical guidelines for Aboriginal people living with diabetes                              | Barriers to effective service delivery                                                                                                                       | In-depth interviews and observation         | Service providers                                                                                                                        | Remote community health centres                |
| Barnett 2011<br>(QLD, Australia) <sup>21</sup>  | Stanford Chronic Disease Self-management Program implemented in Aboriginal communities for people with chronic disease | Acceptability of the intervention within Aboriginal communities and factors that could enhance engagement                                                    | Semi-structured interviews and focus groups | Total of 39 community members, service providers, carers, and peer leaders (who had participated in the course before becoming a leader) | Rural, regional and urban health centres       |
| Barney 2004 (Alaska, USA) <sup>40</sup>         | Case management for Alaska Natives living with HIV/AIDS                                                                | Elements of successful case management                                                                                                                       | Semi-structured interviews                  | Patients and their family, community members, service providers                                                                          | Remote rural villages                          |
| Battersby 2008 (SA, Australia) <sup>22</sup>    | A model of self-management support with Aboriginal people who have diabetes                                            | Acceptability of the model for AHW and patients; barriers and enablers to completing the care plan assessments and supporting patient to achieve their goals | Focus group                                 | Aboriginal Health Workers                                                                                                                | Rural primary care service                     |
| Carey 2013 (Australia) <sup>23</sup>            | A social and emotional well-being program for Aboriginal people needing social and emotional support                   | Issues of effectiveness and sustainability of the service                                                                                                    | Semi-structured interviews                  | Service providers, service participants, carers, family members, referrers, intervention design staff                                    | 1 remote community primary health care service |

|                                                            |                                                                                                                                                                               |                                                                                                                                                                                                                                           |                                                                      |                                                                  |                                                                                                                                                                            |
|------------------------------------------------------------|-------------------------------------------------------------------------------------------------------------------------------------------------------------------------------|-------------------------------------------------------------------------------------------------------------------------------------------------------------------------------------------------------------------------------------------|----------------------------------------------------------------------|------------------------------------------------------------------|----------------------------------------------------------------------------------------------------------------------------------------------------------------------------|
| Davidson 2008 (NSW, Australia) <sup>25</sup>               | A collaborative model of cardiovascular education for AHW conducted within a partnership model                                                                                | Relevance of course content, use of and barriers to the use of course information in the workplace and the course impact on practice                                                                                                      | Semi-structured interviews                                           | Aboriginal Health Workers from urban and rural areas             | Metropolitan tertiary education campus                                                                                                                                     |
| DiGiacomo 2010 (WA, Australia) <sup>26</sup>               | Implementation of National Guidelines for Cardiac Rehabilitation and Secondary Prevention for Aboriginal and Torres Strait Islander peoples: a guide for health professionals | Perceptions of Aboriginal patients' access to cardiac rehabilitation and the role of institutional barriers in implementing the guidelines                                                                                                | Semi-structured interviews                                           | Health professionals                                             | Government health services and Aboriginal medical services across the state                                                                                                |
| DiGiacomo 2010 (WA, Australia) <sup>27</sup>               | Implementation of National Guidelines for Cardiac Rehabilitation and Secondary Prevention for Aboriginal and Torres Strait Islander peoples: a guide for health professionals | Guideline implementation barriers; Perceptions of systems and processes following discharge from hospital, cardio rehabilitation referrals and identifying Aboriginal ethnicity and barriers to accessing cardio rehabilitation services. | Face-to-face semi-structured interviews                              | 38 service providers                                             | Government and community-controlled health services providing cardiac rehabilitation or secondary prevention to Aboriginal people in 10 rural and seven metropolitan areas |
| Gardner 2010 (NT, WA, NSW, QLD in Australia) <sup>28</sup> | Implementation of Audit and Best Practice for Chronic Disease, continuous quality improvement project                                                                         | Factors influencing uptake and establishment of the CQI processes                                                                                                                                                                         | Semi-structured in-depth interviews, observation and document review | 48 service providers, policy officers, intervention team members | 40 community-controlled and government primary health care services, in remote, regional and metropolitan areas                                                            |
| Kowanko 2012 (SA, Australia) <sup>29</sup>                 | Implementation of strategies to manage chronic conditions tailored to suit Aboriginal settings                                                                                | Experiences and ideas about what works, what doesn't and why, in relation to approaches                                                                                                                                                   | Semi-structured interviews                                           | 18 patients and 12 staff                                         | 2 community-controlled and government primary health care services, 1 each in a metropolitan, regional and                                                                 |

|                                          | and clients                                                                                                                                                                                         | and management of chronic conditions. Benefits, barriers and enablers of chronic condition management strategies.                                       |                                                                     |                                    | remote area                                                                                        |
|------------------------------------------|-----------------------------------------------------------------------------------------------------------------------------------------------------------------------------------------------------|---------------------------------------------------------------------------------------------------------------------------------------------------------|---------------------------------------------------------------------|------------------------------------|----------------------------------------------------------------------------------------------------|
| Lloyd 2008 (NT, Australia) <sup>31</sup> | Implementation of the Northern Territory Preventable Chronic Disease Strategy focused on diabetes, heart disease, hypertension, renal disease, chronic airway disease, in the Aboriginal population | Pathways, facilitators of and barriers to policy implementation in a complex health system                                                              | Semi-structured in-depth interviews (recorded)                      | Policy officers, service providers | Urban, rural and remotely located 'mainstream/government' policy or service delivery organisations |
| Lloyd 2009 (NT, Australia) <sup>30</sup> | Implementation of the Northern Territory Preventable Chronic Disease Strategy focused on diabetes, heart disease, hypertension, renal disease, chronic airway disease, in the Aboriginal population | Roles of professional values and the culture of the Australian health care system in facilitating and constraining implementation of the policy         | In-depth interviews                                                 | Policy officers, service providers | Urban, rural and remotely located 'mainstream/government' policy or service delivery organisations |
| Porter 2009 (New Zealand) <sup>39</sup>  | 'Get Checked' program that provides free annual health reviews for all people, including Maori, with diabetes                                                                                       | Barriers to attending annual review                                                                                                                     | Phone interview or questionnaire                                    | 9 Maori/Pacific Islanders          | 8 Rotorua General Practice Group Primary Health Care Organisations                                 |
| Ratima 1999 (New Zealand) <sup>38</sup>  | Asthma self-management program for Maori people                                                                                                                                                     | Experiences of taking part in an asthma self-management program, specifically the acceptability of the program and aspects of the program that could be | Standardised, open-ended interviews by a Pumanawa Hauora researcher | 47 Maori people living with asthma | Health clinics in traditional Maori community centres in rural Maori community                     |

| improved.                                                     |                                                                                                                                                                                                                                        |                                                                                        |                                                                                                                                                  |                                                                                               |                                                                                                                                         |
|---------------------------------------------------------------|----------------------------------------------------------------------------------------------------------------------------------------------------------------------------------------------------------------------------------------|----------------------------------------------------------------------------------------|--------------------------------------------------------------------------------------------------------------------------------------------------|-----------------------------------------------------------------------------------------------|-----------------------------------------------------------------------------------------------------------------------------------------|
| Schierhout 2010 (QLD, NT, WA, NSW in Australia) <sup>33</sup> | Audit and Best Practice in Chronic Disease extension project was the refinement and implementation of a systematic continuous quality improvement program                                                                              | Perceptions of barriers and facilitators to implementation                             | Quarterly reports designed to elicit details on perceptions of barriers and facilitators; purposively structured dialogue with hub co-ordinators | Implementers, key informants                                                                  | 69 government, community controlled primary health centres and general practices across rural, remote, small towns and urban settings   |
| Si 2006 (NT, Australia) <sup>34</sup>                         | Implementation of best practice clinical guidelines in the form of chronic disease specific and age-specific care plans maintained on electronic information systems among Aboriginal people with diabetes and other chronic diseases. | Barriers to Aboriginal health worker involvement in diabetes and chronic illness care  | Semi-structured interviews                                                                                                                       | Health managers, service providers                                                            | Remote primary care services: one community controlled, 1 government                                                                    |
| Thompson 2009 (WA, Australia) <sup>35</sup>                   | Implementation of national guidelines for cardiac rehabilitation and secondary prevention for Aboriginal and Torres Strait Islander peoples                                                                                            | Barriers and facilitators of guideline implementation                                  | Face-to-face semi-structured interviews that allowed for in-depth discussion.                                                                    | 24 Service providers                                                                          | Government/mainstream hospitals and community-based public cardiac rehabilitation services located in 7 rural and 10 metropolitan areas |
| Wakerman 2005 (NT, Australia) <sup>37</sup>                   | Sharing health care initiative that aims to improve health service management and quality of life for people with chronic diseases.                                                                                                    | Factors promoting and inhibiting the sustainability of the Initiative                  | In-depth interviews and a review of project and evaluation documents                                                                             | 1 community-controlled health board member, 1 project evaluator, 3 government representatives | Aboriginal community-controlled primary health care service, remote location                                                            |
| d'Abbs 2008 (far north QLD, Australia) <sup>24</sup>          | Pilot of an evaluation framework designed to evaluate the implementation of                                                                                                                                                            | Understandings of health and health services and perceptions of health-related matters | Group discussions, semi-structured interviews, participant observation, 30                                                                       | Patients, community members, service providers                                                | 2 remote state government primary health care services                                                                                  |

Indigenous Chronic Disease strategy in Aboriginal populations focusing on type 2 diabetes

randomly selected clinic charts audited

### Characteristics of included quantitative studies

| Study                                             | Intervention and condition                                                                                                                                         | Methods                                                                                                    | Intervention participants                                                                                                                                                | Setting                                                                        | Qualitative inquiry                                                                                                                               |
|---------------------------------------------------|--------------------------------------------------------------------------------------------------------------------------------------------------------------------|------------------------------------------------------------------------------------------------------------|--------------------------------------------------------------------------------------------------------------------------------------------------------------------------|--------------------------------------------------------------------------------|---------------------------------------------------------------------------------------------------------------------------------------------------|
| Longstreet 2005 (QLD, Australia) <sup>32</sup>    | Program for Aboriginal and Torres Strait Islander people with diabetes. Holistic, systematic and multi-disciplinary health care approach.                          | Pre-post audit of medical records and brainstorming                                                        | 108 patient records from diabetes register in pre-audit, 99 records post. 7.8% of patients non-Indigenous in pre-audit with significant increase to 28.7% in post-audit. | Aboriginal community-controlled primary health care service, regional location | Service provider perceptions of barriers to patient care and self-management                                                                      |
| Reilley 2010 (USA) <sup>42</sup>                  | Implementation of CDC guidelines of routine HIV testing. Separate written consent should not be required (general medical consent should be considered sufficient) | Cross-sectional survey and additional comments                                                             | All peoples aged 13 – 64 years who presented at the service                                                                                                              | US, Indian Health Service, Metropolitan                                        | 205 service providers experiences of barriers to implementation and their perceptions of patient acceptance, counselling and consent requirements |
| Reilley 2009 (Tucson, Arizona, USA) <sup>41</sup> | Implementation of CDC guidelines for routine HIV testing among and Native American peoples                                                                         | Standardized questionnaire that included open-ended questions                                              | All peoples aged 12 – 55 years who presented at the service                                                                                                              | US, Indian Health Service, Metropolitan                                        | 41 service provider perspectives on patient and provider acceptance and lessons learned in offering expanded HIV testing                          |
| Si 2006 (NT, Australia) <sup>34</sup>             | Implementation of best practice clinical guidelines in the form of chronic disease specific and age-specific care plans maintained on                              | Three-year audit of patient records and health worker profile, observations and semi-structured interviews | 137 Aboriginal people with type 2 diabetes from 7 remote community health centres in the Northern Territory.                                                             | 1 community- controlled and 1 government remote primary care services          | 17 service provider perspectives of barriers to Indigenous health worker involvement in chronic illness care.                                     |

|                                           |                                                                                                                                                                                                                       |                                                                             |                                                                                                                 |                                                                                                                            |                                                                                                                                                    |
|-------------------------------------------|-----------------------------------------------------------------------------------------------------------------------------------------------------------------------------------------------------------------------|-----------------------------------------------------------------------------|-----------------------------------------------------------------------------------------------------------------|----------------------------------------------------------------------------------------------------------------------------|----------------------------------------------------------------------------------------------------------------------------------------------------|
|                                           | electronic information systems among Aboriginal people with diabetes and other chronic diseases.                                                                                                                      |                                                                             |                                                                                                                 |                                                                                                                            |                                                                                                                                                    |
| Tracey 2013 (WA, Australia) <sup>36</sup> | The Goldfields Kidney Disease Nursing Management Program (GKDNMP) designed to improve care processes and service delivery for people with or at risk of chronic kidney disease, implemented in Aboriginal communities | Descriptive narrative of program implementation based on anecdotal evidence | Rural and remote Aboriginal communities in Australia, including the Goldfields region of Western Australia (WA) | 1 hospital and 1 community-controlled health centre in regional areas, outreach to several remote community health centres | Authors' perception of program implementation (no methods, participant numbers and no objective measurement of barriers and facilitators reported) |
